# Supplementary material
Source: PubMed Central journal article supplement (PMC3688265)

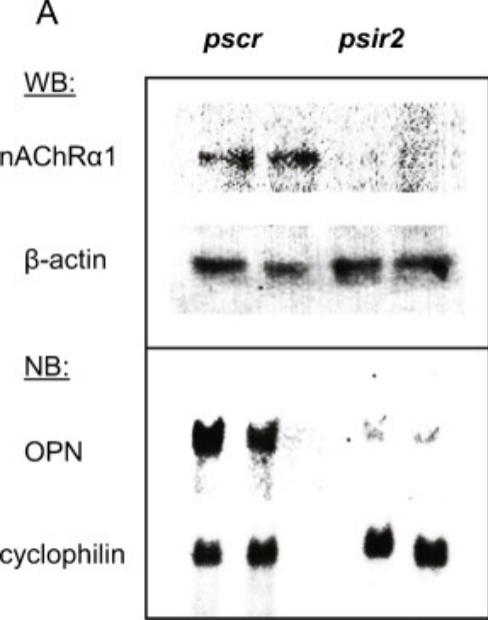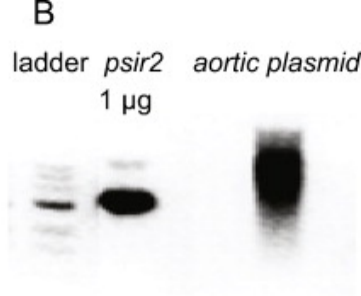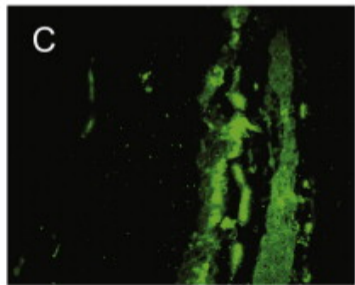

# Von Kosa stain

atheromas (x400)

valves (x250)

*pscr*

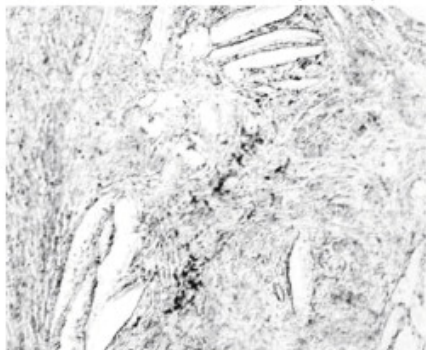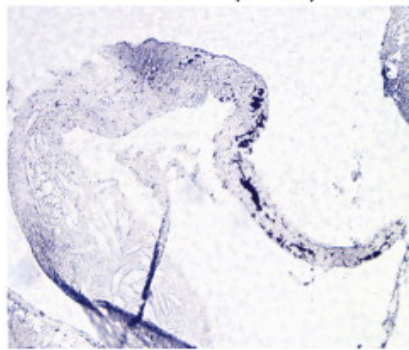

*psir2*

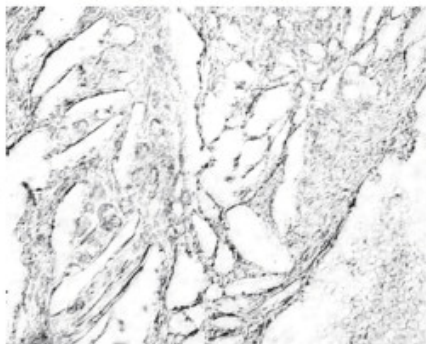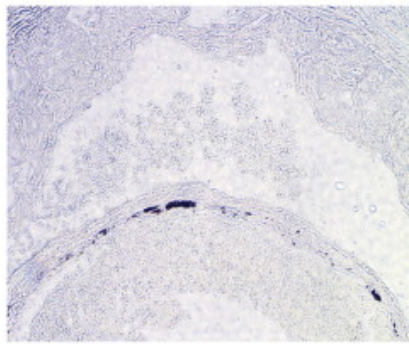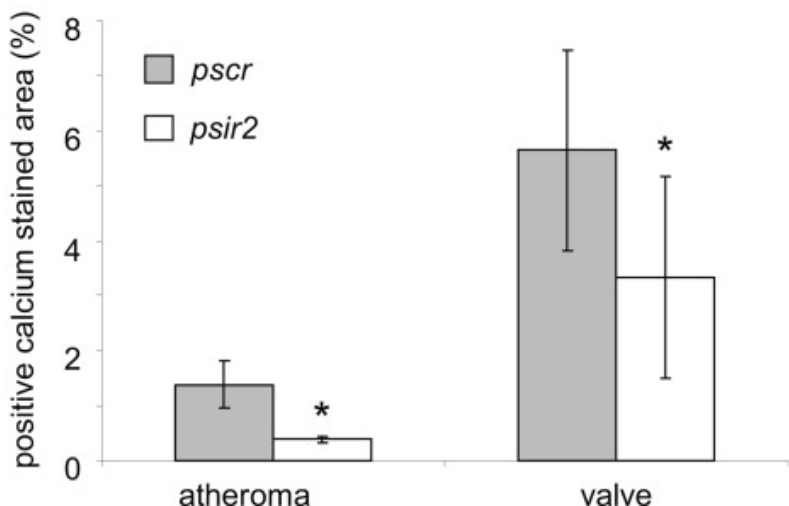

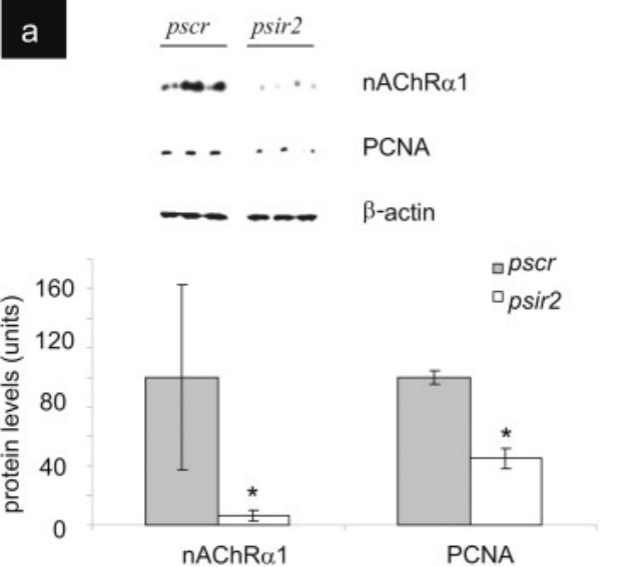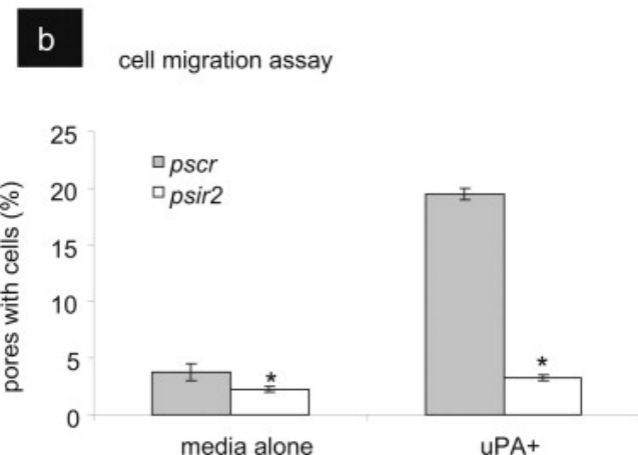

Supplement: NIHMS466566-supplement-Appendix_A.pdf [file NIHMS466566-supplement-Appendix_A.pdf]
